# Supplementary material for: Identification of candidate genes for the diagnosis and treatment of cholangiocarcinoma using a bioinformatics approach
Source: PubMed Central journal article supplement — Oncol Lett. 2019 Sep 20;18(5):5459–67. doi: 10.3892/ol.2019.10904 (PMC6781666; doi:10.3892/ol.2019.10904), 2019-09-20
Supplement: Supplementary_Data1.pdf [file Supplementary_Data1.pdf]

Figure S1. (A) Overall and (B) disease-free survival time analyses of hub genes that did not have a significant effect on patient outcome.  $P < 0.05$  was considered to indicate a statistically significant difference. *IL-6*, interleukin 6; *SST*, somatostatin; *CXCL12*, *CXC* motif chemokine ligand 12; *NPY*, neuropeptide Y; *PLA2G1B*, phospholipase A2 group 1B; *PNLIP*, pancreatic lipase.

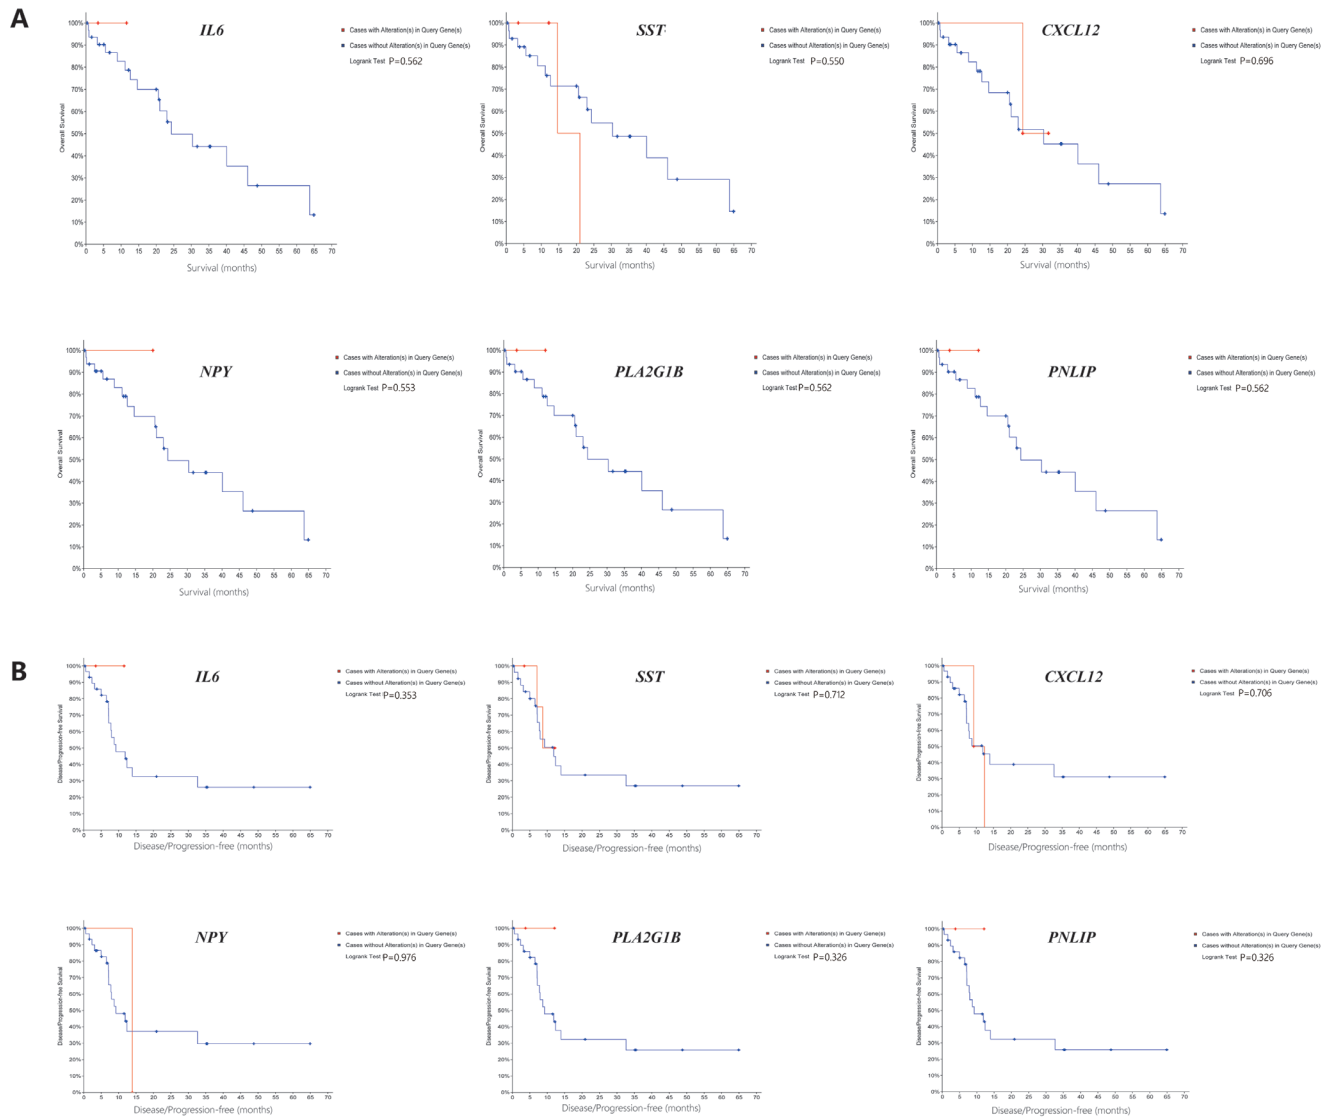

Table S1. Signaling pathway enrichment analysis of the hub genes in cholangiocarcinoma.

| Group ID  | Category                | Term         | Description                                          | LogP     | Log(q-value) | InTerm_InList | Genes                              | Symbols                                   |
|-----------|-------------------------|--------------|------------------------------------------------------|----------|--------------|---------------|------------------------------------|-------------------------------------------|
| L_Summary | Reactome Gene Sets      | R-HSA-418594 | G alpha (i) signalling events                        | -6.48369 | -2.17232     | 5/396         | 1902.4852.5406.6387.6750.3569      | LPAR1_NPY,PNLIPCXCL12,SST,IL6             |
| L_Member  | Reactome Gene Sets      | R-HSA-418594 | G alpha (i) signalling events                        | -6.48369 | -2.17232     | 5/396         | 1902.4852.5406.6387.6750           | LPAR1_NPY,PNLIPCXCL12,SST                 |
| L_Member  | GO Biological Processes | GO:0032103   | Positive regulation of response to external stimulus | -5.31672 | -1.65573     | 4/292         | 1902.3569.4852.6387                | LPAR1_IL6,NPY,CXCL12                      |
| L_Member  | Reactome Gene Sets      | R-HSA-373076 | Class A/1 (Rhodopsin-like receptors)                 | -5.13808 | -1.65573     | 4/324         | 1902.4852.6387.6750                | LPAR1_NPY,CXCL12,SST                      |
| L_Member  | Reactome Gene Sets      | R-HSA-500792 | GPCR ligand binding                                  | -4.55029 | -1.28031     | 4/457         | 1902.4852.6387.6750                | LPAR1_NPY,CXCL12,SST                      |
| L_Member  | GO Biological Processes | GO:010469    | Regulation of signaling receptor activity            | -4.26079 | -1.08156     | 4/542         | 3569.4852.6387.6750                | IL6,NPY,CXCL12,SST                        |
| L_Member  | Reactome Gene Sets      | R-HSA-375276 | Peptide ligand-binding receptors                     | -4.20903 | -1.08156     | 3/190         | 4852.6387.6750                     | NPY,CXCL12,SST                            |
| L_Member  | GO Biological Processes | GO:0021537   | Telencephalon development                            | -3.90815 | -0.99471     | 3/240         | 1902.4852.6387                     | LPAR1_NPY,CXCL12                          |
| L_Member  | GO Biological Processes | GO:0030900   | Forebrain development                                | -3.36196 | -0.63038     | 3/368         | 1902.4852.6387                     | LPAR1_NPY,CXCL12                          |
| L_Member  | GO Biological Processes | GO:0007420   | Brain development                                    | -2.53965 | -0.0916      | 3/709         | 1902.4852.6387                     | LPAR1_NPY,CXCL12                          |
| L_Member  | GO Biological Processes | GO:0060322   | Head development                                     | -2.47038 | -0.0455      | 3/750         | 1902.4852.6387                     | LPAR1_NPY,CXCL12                          |
| 2_Summary | GO Biological Processes | GO:0060193   | Positive regulation of lipase activity               | -5.58758 | -1.65573     | 3/66          | 1902.5319.5406.1360.4609.3569      | LPAR1_PLA2G1B_PNLIP,CPB1_MY<br>C_IL6      |
| 2_Member  | GO Biological Processes | GO:0060193   | Positive regulation of lipase activity               | -5.58758 | -1.65573     | 3/66          | 1902.5319.5406                     | LPAR1_PLA2G1B_PNLIP                       |
| 2_Member  | GO Biological Processes | GO:0060191   | Regulation of lipase activity                        | -5.166   | -1.65573     | 3/91          | 1902.5319.5406                     | LPAR1_PLA2G1B_PNLIP                       |
| 2_Member  | KEGG Pathway            | hsa04972     | Pancreatic secretion                                 | -5.09604 | -1.65573     | 3/96          | 1360.5319.5406                     | CPB1_PLA2G1B_PNLIP                        |
| 2_Member  | GO Biological Processes | GO:0051345   | Positive regulation of hydrolase activity            | -3.72313 | -0.87191     | 4/746         | 1902.4609.5319.5406                | LPAR1_MYC,PLA2G1B_PNLIP                   |
| 2_Member  | GO Biological Processes | GO:0010876   | Lipid localization                                   | -3.3179  | -0.60858     | 3/381         | 3569.5319.5406                     | IL6,PLA2G1B_PNLIP                         |
| 3_Summary | GO Biological Processes | GO:0060326   | Cell chemotaxis                                      | -5.34643 | -1.65573     | 4/287         | 1902.3569.5319.6387.4609.4852.9314 | LPAR1_IL6,PLA2G1B_CXCL12_MY<br>C_NPY,KLF4 |
| 3_Member  | GO Biological Processes | GO:0060326   | Cell chemotaxis                                      | -5.34643 | -1.65573     | 4/287         | 1902.3569.5319.6387                | LPAR1_IL6,PLA2G1B_CXCL12                  |
| 3_Member  | GO Biological Processes | GO:0050921   | Positive regulation of chemotaxis                    | -4.76223 | -1.45086     | 3/124         | 1902.3569.6387                     | LPAR1_IL6_CXCL12                          |
| 3_Member  | GO Biological Processes | GO:0006875   | Cellular metal ion homeostasis                       | -4.21157 | -1.08156     | 4/558         | 1902.4609.5319.6387                | LPAR1_MYC,PLA2G1B_CXCL12                  |
| 3_Member  | GO Biological Processes | GO:0097529   | Myeloid leukocyte migration                          | -4.18881 | -1.08156     | 3/193         | 3569.5319.6387                     | IL6,PLA2G1B_CXCL12                        |
| 3_Member  | GO Biological Processes | GO:0050920   | Regulation of chemotaxis                             | -4.13641 | -1.06348     | 3/201         | 1902.3569.6387                     | LPAR1_IL6_CXCL12                          |
| 3_Member  | GO Biological Processes | GO:0006935   | Chemotaxis                                           | -4.08619 | -1.06348     | 4/601         | 1902.3569.5319.6387                | LPAR1_IL6,PLA2G1B_CXCL12                  |
| 3_Member  | GO Biological Processes | GO:0042330   | Taxis                                                | -4.08338 | -1.06348     | 4/602         | 1902.3569.5319.6387                | LPAR1_IL6,PLA2G1B_CXCL12                  |
| 3_Member  | GO Biological Processes | GO:0030595   | Leukocyte chemotaxis                                 | -4.07383 | -1.06348     | 3/211         | 3569.5319.6387                     | IL6,PLA2G1B_CXCL12                        |
| 3_Member  | GO Biological Processes | GO:0030003   | Cellular cation homeostasis                          | -4.02018 | -1.04317     | 4/625         | 1902.4609.5319.6387                | LPAR1_MYC,PLA2G1B_CXCL12                  |
| 3_Member  | GO Biological Processes | GO:0055065   | Metal ion homeostasis                                | -4.01212 | -1.04317     | 4/628         | 1902.4609.5319.6387                | LPAR1_MYC,PLA2G1B_CXCL12                  |
| 3_Member  | GO Biological Processes | GO:0006873   | Cellular ion homeostasis                             | -3.98552 | -1.03588     | 4/638         | 1902.4609.5319.6387                | LPAR1_MYC,PLA2G1B_CXCL12                  |
| 3_Member  | GO Biological Processes | GO:0055080   | Cation homeostasis                                   | -3.83451 | -0.93811     | 4/698         | 1902.4609.5319.6387                | LPAR1_MYC,PLA2G1B_CXCL12                  |
| 3_Member  | GO Biological Processes | GO:0098771   | Inorganic ion homeostasis                            | -3.80593 | -0.92592     | 4/710         | 1902.4609.5319.6387                | LPAR1_MYC,PLA2G1B_CXCL12                  |
| 3_Member  | GO Biological Processes | GO:0055082   | Cellular chemical homeostasis                        | -3.67238 | -0.85749     | 4/769         | 1902.4609.5319.6387                | LPAR1_MYC,PLA2G1B_CXCL12                  |
| 3_Member  | GO Biological Processes | GO:0050801   | Ion homeostasis                                      | -3.66371 | -0.85749     | 4/773         | 1902.4609.5319.6387                | LPAR1_MYC,PLA2G1B_CXCL12                  |
| 3_Member  | GO Biological Processes | GO:0070482   | Response to oxygen levels                            | -3.45886 | -0.70006     | 3/341         | 1902.4609.6387                     | LPAR1_MYC_CXCL12                          |
| 3_Member  | GO Biological Processes | GO:1903532   | Positive regulation of secretion by cell             | -3.37585 | -0.63268     | 3/364         | 3569.5319.6387                     | IL6,PLA2G1B_CXCL12                        |
| 3_Member  | GO Biological Processes | GO:0051047   | Positive regulation of secretion                     | -3.2818  | -0.58723     | 3/392         | 3569.5319.6387                     | IL6,PLA2G1B_CXCL12                        |
| 3_Member  | GO Biological Processes | GO:0007015   | Actin filament organization                          | -3.27535 | -0.57723     | 3/394         | 1902.5319.6387                     | LPAR1_PLA2G1B_CXCL12                      |
| 3_Member  | GO Biological Processes | GO:0006816   | Calcium ion transport                                | -3.22186 | -0.55394     | 3/411         | 4852.5319.6387                     | NPY,PLA2G1B_CXCL12                        |
| 3_Member  | GO Biological Processes | GO:0006874   | Cellular calcium ion homeostasis                     | -3.15302 | -0.49486     | 3/434         | 1902.5319.6387                     | LPAR1_PLA2G1B_CXCL12                      |
| 3_Member  | GO Biological Processes | GO:0055074   | Calcium ion homeostasis                              | -3.12426 | -0.47565     | 3/444         | 1902.5319.6387                     | LPAR1_PLA2G1B_CXCL12                      |
| 3_Member  | GO Biological Processes | GO:0070838   | Divalent metal ion transport                         | -3.09063 | -0.45135     | 3/456         | 4852.5319.6387                     | NPY,PLA2G1B_CXCL12                        |
| 3_Member  | GO Biological Processes | GO:0072511   | Divalent inorganic cation transport                  | -3.07962 | -0.45025     | 3/460         | 4852.5319.6387                     | NPY,PLA2G1B_CXCL12                        |
| 3_Member  | GO Biological Processes | GO:0072503   | Cellular divalent inorganic cation homeostasis       | -3.05521 | -0.44338     | 3/469         | 1902.5319.6387                     | LPAR1_PLA2G1B_CXCL12                      |

Table S1. Continued.

| Group ID  | Category                | Term       | Description                                                        | LogP     | Log(q-value) | InTerm_InList | Genes                              | Symbols                               |
|-----------|-------------------------|------------|--------------------------------------------------------------------|----------|--------------|---------------|------------------------------------|---------------------------------------|
| 3_Member  | GO Biological Processes | GO:0050900 | Leukocyte migration                                                | -3.04718 | -0.44338     | 3/472         | 3569,5319,6387                     | IL6,PLA2G1B,CXCL12                    |
| 3_Member  | GO Biological Processes | GO:1901652 | Response to peptide                                                | -3.03392 | -0.43855     | 3/477         | 5319,6387,9314                     | PLA2G1B,CXCL12,KLF4                   |
| 3_Member  | GO Biological Processes | GO:0072507 | Divalent inorganic cation homeostasis                              | -3.01041 | -0.42331     | 3/486         | 1902,5319,6387                     | LPAR1,PLA2G1B,CXCL12                  |
| 3_Member  | GO Biological Processes | GO:0030335 | Positive regulation of cell migration                              | -2.99498 | -0.416       | 3/492         | 1902,3569,6387                     | LPAR1,IL6,CXCL12                      |
| 3_Member  | GO Biological Processes | GO:2000147 | Positive regulation of cell motility                               | -2.94985 | -0.37884     | 3/510         | 1902,3569,6387                     | LPAR1,IL6,CXCL12                      |
| 3_Member  | GO Biological Processes | GO:0051272 | Positive regulation of cellular component movement                 | -2.9135  | -0.35031     | 3/525         | 1902,3569,6387                     | LPAR1,IL6,CXCL12                      |
| 3_Member  | GO Biological Processes | GO:0040017 | Positive regulation of locomotion                                  | -2.8759  | -0.3204      | 3/541         | 1902,3569,6387                     | LPAR1,IL6,CXCL12                      |
| 3_Member  | GO Biological Processes | GO:0043410 | Positive regulation of MAPK cascade                                | -2.84169 | -0.29374     | 3/556         | 1902,3569,5319                     | LPAR1,IL6,PLA2G1B                     |
| 3_Member  | GO Biological Processes | GO:0030036 | Actin cytoskeleton organization                                    | -2.67418 | -0.16215     | 3/636         | 1902,5319,6387                     | LPAR1,PLA2G1B,CXCL12                  |
| 3_Member  | GO Biological Processes | GO:0097435 | Supramolecular fiber organization                                  | -2.63387 | -0.14858     | 3/657         | 1902,5319,6387                     | LPAR1,PLA2G1B,CXCL12                  |
| 3_Member  | GO Biological Processes | GO:1903530 | Regulation of secretion by cell                                    | -2.58581 | -0.11954     | 3/683         | 3569,5319,6387                     | IL6,PLA2G1B,CXCL12                    |
| 3_Member  | GO Biological Processes | GO:0030029 | Actin filament-based process                                       | -2.51383 | -0.07169     | 3/724         | 1902,5319,6387                     | LPAR1,PLA2G1B,CXCL12                  |
| 3_Member  | GO Biological Processes | GO:0051046 | Regulation of secretion                                            | -2.49357 | -0.06301     | 3/736         | 3569,5319,6387                     | IL6,PLA2G1B,CXCL12                    |
| 4_Summary | GO Biological Processes | GO:0043408 | Regulation of MAPK cascade                                         | -5.06402 | -1.65573     | 5/770         | 1902,3569,4609,5319,9314,6387      | LPAR1,IL6,MYC,PLA2G1B,KLF4,CXCL12     |
| 4_Member  | GO Biological Processes | GO:0043408 | Regulation of MAPK cascade                                         | -5.06402 | -1.65573     | 5/770         | 1902,3569,4609,5319,9314           | LPAR1,IL6,MYC,PLA2G1B,KLF4            |
| 4_Member  | KEGG Pathway            | hsa05200   | Pathways in cancer                                                 | -4.79884 | -1.45086     | 4/395         | 1902,3569,4609,6387                | LPAR1,IL6,MYC,CXCL12                  |
| 4_Member  | GO Biological Processes | GO:0051347 | Positive regulation of transferase activity                        | -3.93105 | -0.99989     | 4/659         | 1902,4609,5319,9314                | LPAR1,MYC,PLA2G1B,KLF4                |
| 4_Member  | KEGG Pathway            | hsa04151   | PI3K-Akt signaling pathway                                         | -3.45513 | -0.70006     | 3/342         | 1902,3569,4609                     | LPAR1,IL6,MYC                         |
| 4_Member  | GO Biological Processes | GO:0043065 | Positive regulation of apoptotic process                           | -2.70584 | -0.1798      | 3/620         | 1902,3569,4609                     | LPAR1,IL6,MYC                         |
| 4_Member  | GO Biological Processes | GO:0043068 | Positive regulation of programmed cell death                       | -2.69387 | -0.17489     | 3/626         | 1902,3569,4609                     | LPAR1,IL6,MYC                         |
| 4_Member  | GO Biological Processes | GO:0010942 | Positive regulation of cell death                                  | -2.59126 | -0.11954     | 3/680         | 1902,3569,4609                     | LPAR1,IL6,MYC                         |
| 4_Member  | GO Biological Processes | GO:0045596 | Negative regulation of cell differentiation                        | -2.53965 | -0.0916      | 3/709         | 1902,3569,4609                     | LPAR1,IL6,MYC                         |
| 4_Member  | GO Biological Processes | GO:0019221 | Cytokine-mediated signaling pathway                                | -2.50366 | -0.06735     | 3/730         | 3569,4609,6387                     | IL6,MYC,CXCL12                        |
| 5_Summary | GO Biological Processes | GO:1902532 | Negative regulation of intracellular signal transduction           | -4.35726 | -1.12507     | 4/512         | 1902,4609,6387,9314,3569,6750,5319 | LPAR1,MYC,CXCL12,KLF4,IL6,SST,PLA2G1B |
| 5_Member  | GO Biological Processes | GO:1902532 | Negative regulation of intracellular signal transduction           | -4.35726 | -1.12507     | 4/512         | 1902,4609,6387,9314                | LPAR1,MYC,CXCL12,KLF4                 |
| 5_Member  | GO Biological Processes | GO:0008285 | Negative regulation of cell proliferation                          | -3.72089 | -0.87191     | 4/747         | 3569,4609,6750,9314                | IL6,MYC,SST,KLF4                      |
| 5_Member  | GO Biological Processes | GO:1903037 | Regulation of leukocyte cell-cell adhesion                         | -3.66999 | -0.85749     | 3/289         | 3569,6387,9314                     | IL6,CXCL12,KLF4                       |
| 5_Member  | GO Biological Processes | GO:0007159 | Leukocyte cell-cell adhesion                                       | -3.53191 | -0.73905     | 3/322         | 3569,6387,9314                     | IL6,CXCL12,KLF4                       |
| 5_Member  | GO Biological Processes | GO:0035690 | Cellular response to drug                                          | -3.45886 | -0.70006     | 3/341         | 3569,4609,9314                     | IL6,MYC,KLF4                          |
| 5_Member  | GO Biological Processes | GO:0022407 | Regulation of cell-cell adhesion                                   | -3.32457 | -0.60858     | 3/379         | 3569,6387,9314                     | IL6,CXCL12,KLF4                       |
| 5_Member  | GO Biological Processes | GO:0051090 | Regulation of DNA-binding transcription factor activity            | -3.24047 | -0.56257     | 3/405         | 3569,5319,9314                     | IL6,PLA2G1B,KLF4                      |
| 5_Member  | GO Biological Processes | GO:0010975 | Regulation of neuron projection development                        | -3.07143 | -0.45025     | 3/463         | 1902,6387,9314                     | LPAR1,CXCL12,KLF4                     |
| 5_Member  | GO Biological Processes | GO:0071396 | Cellular response to lipid                                         | -2.77394 | -0.23342     | 3/587         | 1902,3569,9314                     | LPAR1,IL6,KLF4                        |
| 5_Member  | GO Biological Processes | GO:0045664 | Regulation of neuron differentiation                               | -2.71187 | -0.1798      | 3/617         | 1902,6387,9314                     | LPAR1,CXCL12,KLF4                     |
| 5_Member  | GO Biological Processes | GO:0030155 | Regulation of cell adhesion                                        | -2.65289 | -0.15444     | 3/647         | 3569,6387,9314                     | IL6,CXCL12,KLF4                       |
| 5_Member  | GO Biological Processes | GO:0120035 | Regulation of plasma membrane bounded cell projection organization | -2.65289 | -0.15444     | 3/647         | 1902,6387,9314                     | LPAR1,CXCL12,KLF4                     |
| 5_Member  | GO Biological Processes | GO:0031344 | Regulation of cell projection organization                         | -2.63387 | -0.14858     | 3/657         | 1902,6387,9314                     | LPAR1,CXCL12,KLF4                     |
| 5_Member  | GO Biological Processes | GO:0080135 | Regulation of cellular response to stress                          | -2.62261 | -0.14374     | 3/663         | 4609,6387,9314                     | MYC,CXCL12,KLF4                       |

Table S1. Continued.

| Group ID | Category                | Term       | Description                | LogP     | Log(q-value) | InTerm_InList | Genes          | Symbols           |
|----------|-------------------------|------------|----------------------------|----------|--------------|---------------|----------------|-------------------|
| 5_Member | GO Biological Processes | GO:0001816 | Cytokine production        | -2,55719 | -0,09708     | 3/699         | 3569,5319,9314 | IL6,PLA2G1B,KLF4  |
| 5_Member | GO Biological Processes | GO:0050767 | Regulation of neurogenesis | -2,45734 | -0,03806     | 3/758         | 1902,6387,9314 | LPAR1,CXCL12,KLF4 |
| 5_Member | GO Biological Processes | GO:0098609 | Cell-cell adhesion         | -2,43009 | -0,01635     | 3/775         | 3569,6387,9314 | IL6,CXCL12,KLF4   |
